# Supplementary material
Source: MDPI journal article supplement (https://www.mdpi.com/2075-4655/7/1/4)
Supplement: s1 [file s1]

Supplementary Table S1: Spearman's rank correlation coefficients between DNAm z-score at LINE-1 CpG sites:

|               | LINE-1 site 1  | LINE-1 site 2  | LINE-1 site 3  | LINE-1 site 4  |
|---------------|----------------|----------------|----------------|----------------|
| LINE-1 site 1 |                | 0.69 (<0.0001) | 0.57 (<0.0001) | 0.31 (<0.0001) |
| LINE-1 site 2 | 0.69 (<0.0001) |                | 0.79 (<0.0001) | 0.55 (<0.0001) |
| LINE-1 site 3 | 0.57(<0.0001)  | 0.79 (<0.0001) |                | 0.59 (<0.0001) |

Values presented are Spearman's rank correlation coefficients (*p*)

Supplementary Table S2: Spearman's rank correlation coefficients between DNAm z-score at *11β-HSD-2* CpG sites:

|                         | <i>11β-HSD-2</i> site 1 | <i>11β-HSD-2</i> site 2 | <i>11β-HSD-2</i> site 3 | <i>11β-HSD-2</i> site 4 | <i>11β-HSD-2</i> site 5 |
|-------------------------|-------------------------|-------------------------|-------------------------|-------------------------|-------------------------|
| <i>11β-HSD-2</i> site 1 |                         | 0.29 (<0.0001)          | 0.69 (<0.0001)          | -0.37 (<0.0001)         | 0.16 (0.0131)           |
| <i>11β-HSD-2</i> site 2 | 0.29 (<0.0001)          |                         | 0.41 (<0.0001)          | -0.08 (0.2556)          | -0.03 (0.6497)          |
| <i>11β-HSD-2</i> site 3 | 0.69 (<0.0001)          | 0.41 (<0.0001)          |                         | -0.27 (<0.0001)         | 0.10 (0.1265)           |
| <i>11β-HSD-2</i> site 4 | -0.37 (<0.0001)         | -0.08 (0.2556)          | -0.27 (<0.0001)         |                         | -0.20 (0.0022)          |

Values presented are Spearman's rank correlation coefficients (*p*)

Supplementary Table S3: Spearman's rank correlation coefficients between DNAm z-score at *H19* CpG sites:

|                   | <i>H19</i> site 1 | <i>H19</i> site 2 | <i>H19</i> site 3 | <i>H19</i> site 4 |
|-------------------|-------------------|-------------------|-------------------|-------------------|
| <i>H19</i> site 1 |                   | 0.26 (<0.0001)    | 0.44 (<0.0001)    | 0.94 (<0.0001)    |
| <i>H19</i> site 2 | 0.26 (<0.0001)    |                   | 0.84 (<0.0001)    | 0.17 (<0.0001)    |
| <i>H19</i> site 3 | 0.44 (<0.0001)    | 0.84 (<0.0001)    |                   | 0.37 (<0.0001)    |

Values presented are Spearman's rank correlation coefficients (*p*)

Supplementary Table S4: Spearman's rank correlation coefficients between DNAm z-score at *PPAR-α* CpG sites:

|                      |                      |
|----------------------|----------------------|
|                      | <i>PPAR-α</i> site 2 |
| <i>PPAR-α</i> site 1 | 0.47 (<0.0001)       |

Values presented are Spearman's rank correlation coefficients (*p*)

Supplementary Table S5: Associations between DNAm z-score at LINE- 1 and Repeated Measures of Cardiometabolic Risk Factors using Mixed-effects Models Adjusting for Pubertal Onset ( $n=242$ ):

|                                                                                                                                       | LINE-1 z-score at site 1 |         | LINE-1 score at site 2 |         | LINE-1 score at site 3 |         | LINE-1 score at site 4 |         |
|---------------------------------------------------------------------------------------------------------------------------------------|--------------------------|---------|------------------------|---------|------------------------|---------|------------------------|---------|
|                                                                                                                                       | Estimate (SE)            | P-value | Estimate (SE)          | P-value | Estimate (SE)          | P-value | Estimate (SE)          | P-value |
| <b>Waist circumference (cm)</b>                                                                                                       |                          |         |                        |         |                        |         |                        |         |
| (Total number of observations=441; of which 43 (17.77%) subjects had one measurement, and 199 (82.23%) subjects had two measurements) |                          |         |                        |         |                        |         |                        |         |
| <b>Model 1</b>                                                                                                                        | -0.5960 (1.0435)         | 0.5684  | 1.1418 (1.4217)        | 0.4227  | -0.4783 (1.1510)       | 0.6781  | 0.2997 (0.9013)        | 0.7398  |
| <b>Model 2</b>                                                                                                                        | 0.6325 (1.0098)          | 0.5317  | 1.0269 (1.3678)        | 0.4535  | -1.9266 (1.1252)       | 0.0881  | 0.3154 (0.8699)        | 0.7172  |
| <b>Systolic blood pressure (mmHg)</b>                                                                                                 |                          |         |                        |         |                        |         |                        |         |
| (Total number of observations=441; of which 43 (17.77%) subjects had one measurement, and 199 (82.23%) subjects had two measurements) |                          |         |                        |         |                        |         |                        |         |
| <b>Model 1</b>                                                                                                                        | -0.4560 (0.8541)         | 0.5939  | -0.1855 (1.1698)       | 0.8741  | 0.1632 (0.9435)        | 0.8628  | 0.9703 (0.7361)        | 0.1887  |
| <b>Model 2</b>                                                                                                                        | -0.6264 (0.8602)         | 0.4672  | 0.2907 (1.1720)        | 0.8043  | -0.3020 (0.9613)       | 0.7537  | 0.8606 (0.7375)        | 0.2444  |
| <b>Diastolic blood pressure (mmHg)</b>                                                                                                |                          |         |                        |         |                        |         |                        |         |
| (Total number of observations=441; of which 43 (17.77%) subjects had one measurement, and 199 (82.23%) subjects had two measurements) |                          |         |                        |         |                        |         |                        |         |
| <b>Model 1</b>                                                                                                                        | -0.5185 (0.5769)         | 0.3697  | 0.1316 (0.7927)        | 0.8682  | 0.2271 (0.6379)        | 0.7221  | 0.3619 (0.4966)        | 0.4669  |
| <b>Model 2</b>                                                                                                                        | -0.4927 (0.5769)         | 0.3940  | 0.1524 (0.7887)        | 0.8469  | -0.09831 (0.6458)      | 0.8791  | 0.3551 (0.4932)        | 0.4723  |
| <b>Log transformed fasting glucose (mg/dL)</b>                                                                                        |                          |         |                        |         |                        |         |                        |         |
| (Total number of observations=438; of which 46 (19.01%) subjects had one measurement, and 196 (80.99%) subjects had two measurements) |                          |         |                        |         |                        |         |                        |         |
| <b>Model 1</b>                                                                                                                        | -0.01570 (0.007838)      | 0.0463  | 0.02427 (0.01086)      | 0.0263  | -0.00357 (0.008708)    | 0.6825  | -0.00361 (0.006726)    | 0.5917  |
| <b>Model 2</b>                                                                                                                        | -0.02747 (0.008217)      | 0.0010* | 0.02862 (0.01124)      | 0.0115  | 0.008495 (0.009213)    | 0.3575  | -0.00145 (0.007023)    | 0.8362  |
| <b>Log transformed high-density lipoprotein cholesterol (mg/dL)</b>                                                                   |                          |         |                        |         |                        |         |                        |         |
| (Total number of observations=438; of which 46 (19.01%) subjects had one measurement, and 196 (80.99%) subjects had two measurements) |                          |         |                        |         |                        |         |                        |         |
| <b>Model 1</b>                                                                                                                        | 0.02078 (0.01893)        | 0.2733  | -0.02664 (0.02610)     | 0.3083  | 0.01023 (0.02099)      | 0.6265  | -0.01677 (0.01627)     | 0.3039  |
| <b>Model 2</b>                                                                                                                        | -0.00710 (0.02059)       | 0.7305  | -0.02295 (0.02796)     | 0.4127  | 0.04707 (0.02299)      | 0.0417  | -0.00636 (0.01771)     | 0.7197  |
| <b>Log transformed triglycerides (mg/dL)</b>                                                                                          |                          |         |                        |         |                        |         |                        |         |
| (Total number of observations=438; of which 46 (19.01%) subjects had one measurement, and 196 (80.99%) subjects had two measurements) |                          |         |                        |         |                        |         |                        |         |
| <b>Model 1</b>                                                                                                                        | -0.05170 (0.04055)       | 0.2035  | -0.03424 (0.05541)     | 0.5372  | 0.05445 (0.04481)      | 0.2255  | -0.00392 (0.03498)     | 0.9109  |
| <b>Model 2</b>                                                                                                                        | -0.02828 (0.03955)       | 0.4752  | -0.04454 (0.05388)     | 0.4093  | 0.05366 (0.04424)      | 0.2263  | 0.009718 (0.03392)     | 0.7747  |

- Long interspersed nuclear elements (LINE-1)
- Model 1 includes LINE-1 z-score at CpG site 1, 2, 3, and 4 as fixed effects, and compound symmetry matrix structure to model the covariance structure of the repeated measurements for each outcome
- Model 2 is additionally adjusted for the following fixed effects: age, sex, duration of breastfeeding, and pubertal onset

\*  $p < 0.008$

Supplementary Table S6: Associations between DNAm z-score at *11β-HSD-2* and Repeated Measures of Cardiometabolic Risk

Factors using Mixed-effects Models Adjusting for Pubertal Onset (*n*=229):

|                                                                                                                                       | <i>11β-HSD-2</i> score at site 1 |         | <i>11β-HSD-2</i> score at site 2 |         | <i>11β-HSD-2</i> score at site 3 |         | <i>11β-HSD-2</i> score at site 4 |         | <i>11β-HSD-2</i> score at site 5 |         |
|---------------------------------------------------------------------------------------------------------------------------------------|----------------------------------|---------|----------------------------------|---------|----------------------------------|---------|----------------------------------|---------|----------------------------------|---------|
|                                                                                                                                       | Estimate (SE)                    | P-value |
| <b>Waist circumference (cm)</b>                                                                                                       |                                  |         |                                  |         |                                  |         |                                  |         |                                  |         |
| (Total number of observations=415; of which 43 (18.78%) subjects had one measurement, and 186 (81.22%) subjects had two measurements) |                                  |         |                                  |         |                                  |         |                                  |         |                                  |         |
| <b>Model 1</b>                                                                                                                        | -0.3822<br>(1.0424)              | 0.7142  | -0.08657 (0.7980)                | 0.9137  | 0.2635 (0.9701)                  | 0.7862  | 0.5264<br>(0.7690)               | 0.4943  | 0.2132<br>(0.7252)               | 0.7690  |
| <b>Model 2</b>                                                                                                                        | -1.1584<br>(1.0033)              | 0.2494  | 0.2359<br>(0.7715)               | 0.7601  | 0.6570 (0.9358)                  | 0.4833  | 0.5122<br>(0.7455)               | 0.4928  | -0.1516<br>(0.6976)              | 0.8281  |
| <b>Systolic blood pressure (mmHg)</b>                                                                                                 |                                  |         |                                  |         |                                  |         |                                  |         |                                  |         |
| (Total number of observations=415; of which 43(18.78%) subjects had one measurement, and 186 (81.22%) subjects had two measurements)  |                                  |         |                                  |         |                                  |         |                                  |         |                                  |         |
| <b>Model 1</b>                                                                                                                        | -1.6096<br>(0.8326)              | 0.0545  | -0.7568<br>(0.6372)              | 0.2362  | 1.2770 (0.7754)                  | 0.1010  | 0.3766<br>(0.6161)               | 0.5416  | -0.4901<br>(0.5780)              | 0.3974  |
| <b>Model 2</b>                                                                                                                        | -1.6853<br>(0.8414)              | 0.0464  | -0.6070<br>(0.6463)              | 0.3487  | 1.6432 (0.7850)                  | 0.0375  | -0.2687<br>(0.6286)              | 0.6695  | -0.4886<br>(0.5828)              | 0.4027  |
| <b>Diastolic blood pressure (mmHg)</b>                                                                                                |                                  |         |                                  |         |                                  |         |                                  |         |                                  |         |
| (Total number of observations=415; of which 43 (18.78%) subjects had one measurement, and 186 (81.22%) subjects had two measurements) |                                  |         |                                  |         |                                  |         |                                  |         |                                  |         |
| <b>Model 1</b>                                                                                                                        | -0.9251<br>(0.5519)              | 0.0951  | -0.8601<br>(0.4222)              | 0.0428  | 0.3540 (0.5143)                  | 0.4920  | 0.4535<br>(0.4092)               | 0.2690  | -0.01360 (0.3827)                | 0.9717  |
| <b>Model 2</b>                                                                                                                        | -1.0194<br>(0.5506)              | 0.0654  | -0.8295<br>(0.4225)              | 0.0509  | 0.6060<br>(0.5139)               | 0.2395  | 0.07628<br>(0.4130)              | 0.8537  | -0.05509<br>(0.3803)             | 0.8850  |
| <b>Log transformed fasting glucose(mg/dL)</b>                                                                                         |                                  |         |                                  |         |                                  |         |                                  |         |                                  |         |
| (Total number of observations=412; of which 46 (20.09%) subjects had one measurement, and 183 (79.91%) subjects had two measurements) |                                  |         |                                  |         |                                  |         |                                  |         |                                  |         |
| <b>Model 1</b>                                                                                                                        | -0.00076<br>(0.007513)           | 0.9193  | 0.001955 (0.005764)              | 0.7348  | 0.006329<br>(0.006998)           | 0.3668  | -0.01869 (0.005586)              | 0.0010* | 0.002692 (0.005216)              | 0.6064  |
| <b>Model 2</b>                                                                                                                        | 0.007693<br>(0.007835)           | 0.3273  | -0.00143 (0.006025)              | 0.8121  | 0.004141<br>(0.007304)           | 0.5713  | -0.02250 (0.005876)              | 0.0002* | 0.006799 (0.005426)              | 0.2116  |
| <b>Log transformed high-density lipoprotein cholesterol (mg/dL)</b>                                                                   |                                  |         |                                  |         |                                  |         |                                  |         |                                  |         |
| (Total number of observations=412; of which 46 (20.09%) subjects had one measurement, and 183 (79.91%) subjects had two measurements) |                                  |         |                                  |         |                                  |         |                                  |         |                                  |         |
| <b>Model 1</b>                                                                                                                        | 0.002550<br>(0.01874)            | 0.8919  | -0.00550 (0.01438)               | 0.7026  | -0.00829 (0.01745)               | 0.6351  | -0.01132 (0.01390)               | 0.4161  | 0.005434 (0.01303)               | 0.6770  |
| <b>Model 2</b>                                                                                                                        | 0.02022<br>(0.02000)             | 0.3132  | -0.01804 (0.01539)               | 0.2423  | -0.01149 (0.01865)               | 0.5386  | -0.02960 (0.01489)               | 0.0481  | 0.01555<br>(0.01390)             | 0.2645  |
| <b>Log transformed triglycerides (mg/dL)</b>                                                                                          |                                  |         |                                  |         |                                  |         |                                  |         |                                  |         |
| (Total number of observations=412; of which 46 (20.09%) subjects had one measurement, and 183 (79.91%) subjects had two measurements) |                                  |         |                                  |         |                                  |         |                                  |         |                                  |         |

|                |                      |        |                      |        |                    |        |                      |        |                    |        |
|----------------|----------------------|--------|----------------------|--------|--------------------|--------|----------------------|--------|--------------------|--------|
| <b>Model 1</b> | 0.02425<br>(0.04126) | 0.5572 | 0.03580<br>(0.03163) | 0.2588 | 0.004623 (0.03838) | 0.9042 | 0.01794<br>(0.03047) | 0.5566 | -0.00972 (0.02872) | 0.7354 |
| <b>Model 2</b> | 0.01567<br>(0.04011) | 0.6964 | 0.03023<br>(0.03086) | 0.3282 | 0.008336 (0.03740) | 0.8238 | 0.02187<br>(0.02995) | 0.4660 | -0.01640 (0.02784) | 0.5564 |

- 11 $\beta$ -hydroxysteroid dehydrogenase type 2 (*11 $\beta$ -HSD-2*)
- Model 1 includes *11 $\beta$ -HSD-2* z-scores for CpG sites 1, 2, 3, 4, and 5 as fixed effects and compound symmetry matrix structure to model the covariance structure of the repeated measurements for each outcome
- Model 2 is additionally adjusted for the following fixed effects: age, sex, and pubertal onset

\*  $p < 0.008$



Supplementary Table S7: Associations between DNAm z-score at *H19* and Repeated Measures of Cardiometabolic Risk Factors using Mixed-effects Models ( $n=245$ ):

|                                                                                                                                       | <i>H19</i> score at site 1 |         | <i>H19</i> score at site 2 |         | <i>H19</i> score at site 3 |         | <i>H19</i> score at site 4 |         |
|---------------------------------------------------------------------------------------------------------------------------------------|----------------------------|---------|----------------------------|---------|----------------------------|---------|----------------------------|---------|
|                                                                                                                                       | Estimate (SE)              | P-value |
| <b>Waist circumference (cm)</b>                                                                                                       |                            |         |                            |         |                            |         |                            |         |
| (Total number of observations=446; of which 44 (17.96%) subjects had one measurement, and 201 (82.04%) subjects had two measurements) |                            |         |                            |         |                            |         |                            |         |
| <b>Model 1</b>                                                                                                                        | -2.0199 (2.3712)           | 0.3951  | 0.4201 (0.9290)            | 0.6515  | -0.1023 (1.0516)           | 0.9226  | 1.7246 (2.3175)            | 0.4575  |
| <b>Model 2</b>                                                                                                                        | -0.4958 (2.2859)           | 0.8285  | 0.07485 (0.9050)           | 0.9342  | -0.01468 (1.0179)          | 0.9885  | 1.0578 (2.2350)            | 0.6364  |
| <b>Systolic blood pressure (mmHg)</b>                                                                                                 |                            |         |                            |         |                            |         |                            |         |
| (Total number of observations=446; of which 44 (17.96%) subjects had one measurement, and 201 (82.04%) subjects had two measurements) |                            |         |                            |         |                            |         |                            |         |
| <b>Model 1</b>                                                                                                                        | 2.9254 (1.9347)            | 0.1318  | 0.5769 (0.7460)            | 0.4402  | -0.3888 (0.8519)           | 0.6485  | -2.0551 (1.8928)           | 0.2786  |
| <b>Model 2</b>                                                                                                                        | 2.1289 (2.0092)            | 0.2905  | 0.6308 (0.7785)            | 0.4188  | -0.3848 (0.8852)           | 0.6643  | -1.4683 (1.9667)           | 0.4561  |
| <b>Diastolic blood pressure (mmHg)</b>                                                                                                |                            |         |                            |         |                            |         |                            |         |
| (Total number of observations=446; of which 44 (17.96%) subjects had one measurement, and 201 (82.04%) subjects had two measurements) |                            |         |                            |         |                            |         |                            |         |
| <b>Model 1</b>                                                                                                                        | 1.9218 (1.3080)            | 0.1430  | 0.07059 (0.5004)           | 0.8880  | -0.1770 (0.5740)           | 0.7580  | -1.1655 (1.2803)           | 0.3635  |
| <b>Model 2</b>                                                                                                                        | 1.7656 (1.3295)            | 0.1855  | 0.07927 (0.5086)           | 0.8763  | -0.1730 (0.5822)           | 0.7667  | -1.0460 (1.3026)           | 0.4228  |
| <b>Log transformed fasting glucose(mg/dL)</b>                                                                                         |                            |         |                            |         |                            |         |                            |         |
| (Total number of observations=443; of which 47 (19.18%) subjects had one measurement, and 198 (80.82%) subjects had two measurements) |                            |         |                            |         |                            |         |                            |         |
| <b>Model 1</b>                                                                                                                        | -0.00046<br>(0.01808)      | 0.9796  | 0.002770 (0.006771)        | 0.6829  | 0.004283 (0.007883)        | 0.5875  | -0.00728 (0.01773)         | 0.6816  |
| <b>Model 2</b>                                                                                                                        | -0.01426<br>(0.01900)      | 0.4536  | 0.006626 (0.007262)        | 0.3627  | 0.001784 (0.008333)        | 0.8307  | -0.00365 (0.01861)         | 0.8448  |
| <b>Log transformed high-density lipoprotein cholesterol (mg/dL)</b>                                                                   |                            |         |                            |         |                            |         |                            |         |
| (Total number of observations=443; of which 47 (19.18%) subjects had one measurement, and 198 (80.82%) subjects had two measurements) |                            |         |                            |         |                            |         |                            |         |
| <b>Model 1</b>                                                                                                                        | 0.08297<br>(0.04325)       | 0.0562  | -0.00522 (0.01640)         | 0.7507  | -0.00854 (0.01895)         | 0.6527  | -0.09188 (0.04237)         | 0.0311  |
| <b>Model 2</b>                                                                                                                        | 0.04381<br>(0.04758)       | 0.3582  | 0.009569 (0.01869)         | 0.6091  | -0.01912 (0.02112)         | 0.3663  | -0.08270 (0.04654)         | 0.0769  |
| <b>Log transformed triglycerides (mg/dL)</b>                                                                                          |                            |         |                            |         |                            |         |                            |         |
| (Total number of observations=443; of which 47 (19.18%) subjects had one measurement, and 198 (80.82%) subjects had two measurements) |                            |         |                            |         |                            |         |                            |         |
| <b>Model 1</b>                                                                                                                        | -0.09145<br>(0.09240)      | 0.3233  | 0.03856 (0.03589)          | 0.2838  | -0.02407 (0.04087)         | 0.5566  | 0.1266 (0.09037)           | 0.1626  |
| <b>Model 2</b>                                                                                                                        | -0.04746<br>(0.08976)      | 0.5975  | 0.03792 (0.03481)          | 0.2772  | -0.02790 (0.03962)         | 0.4820  | 0.09088 (0.08786)          | 0.3020  |

- Model 1 includes *H19* z-scores for CpG site 1, 2, 3, and 4 as fixed effects, and compound symmetry matrix structure to model the covariance structure of the repeated measurements for each outcome

- Model 2 is additionally adjusted for the following fixed effects: age and sex

\*  $p < 0.008$

Supplementary Table S8: Associations between DNAm z-score at *H19* and Repeated Measures of Cardiometabolic Risk Factors using Mixed-effects Models after Removing Outlier DNAm Value ( $n=244$ ):

|                                                                                                                                       | <i>H19</i> score at site 1 |         | <i>H19</i> score at site 2 |         | <i>H19</i> score at site 3 |         | <i>H19</i> score at site 4 |         |
|---------------------------------------------------------------------------------------------------------------------------------------|----------------------------|---------|----------------------------|---------|----------------------------|---------|----------------------------|---------|
|                                                                                                                                       | Estimate (SE)              | P-value |
| <b>Waist circumference (cm)</b>                                                                                                       |                            |         |                            |         |                            |         |                            |         |
| (Total number of observations=444; of which 44 (18.03%) subjects had one measurement, and 200 (81.97%) subjects had two measurements) |                            |         |                            |         |                            |         |                            |         |
| <b>Model 1</b>                                                                                                                        | -1.9711 (2.3738)           | 0.4072  | 1.7287 (1.9031)            | 0.3646  | -0.9859 (1.5380)           | 0.5221  | 1.8050 (2.3215)            | 0.4376  |
| <b>Model 2</b>                                                                                                                        | -0.4707 (2.2913)           | 0.8374  | 0.5902 (1.8478)            | 0.7497  | -0.3633 (1.4905)           | 0.8076  | 1.0906 (2.2422)            | 0.6271  |
| <b>Systolic blood pressure (mmHg)</b>                                                                                                 |                            |         |                            |         |                            |         |                            |         |
| (Total number of observations=444; of which 44 (18.03%) subjects had one measurement, and 200 (81.97%) subjects had two measurements) |                            |         |                            |         |                            |         |                            |         |
| <b>Model 1</b>                                                                                                                        | 2.9096 (1.9392)            | 0.1348  | 0.1319 (1.5394)            | 0.9318  | -0.08892 (1.2463)          | 0.9432  | -2.0820 (1.8985)           | 0.2739  |
| <b>Model 2</b>                                                                                                                        | 2.1309 2.0126              | 0.2909  | 0.5685 (1.6014)            | 0.7230  | -0.3428 (1.2944)           | 0.7914  | -1.4729 (1.9721)           | 0.4559  |
| <b>Diastolic blood pressure (mmHg)</b>                                                                                                |                            |         |                            |         |                            |         |                            |         |
| (Total number of observations=444; of which 44 (18.03%) subjects had one measurement, and 200 (81.97%) subjects had two measurements) |                            |         |                            |         |                            |         |                            |         |
| <b>Model 1</b>                                                                                                                        | 1.9019 (1.3105)            | 0.1480  | -0.5299 (1.0351)           | 0.6092  | 0.2280 (0.8388)            | 0.7860  | -1.2025 (1.2836)           | 0.3498  |
| <b>Model 2</b>                                                                                                                        | 1.7543 (1.3311)            | 0.1889  | -0.4459 (1.0506)           | 0.6717  | 0.1809 (0.8503)            | 0.8317  | -1.0820 (1.3054)           | 0.4081  |
| <b>Log transformed fasting glucose(mg/dL)</b>                                                                                         |                            |         |                            |         |                            |         |                            |         |
| (Total number of observations=441; of which 47 (19.26%) subjects had one measurement, and 197 (80.74%) subjects had two measurements) |                            |         |                            |         |                            |         |                            |         |
| <b>Model 1</b>                                                                                                                        | -0.00042 (0.01812)         | 0.9813  | 0.004047 (0.01413)         | 0.7749  | 0.003419 (0.01151)         | 0.7667  | -0.00720 (0.01778)         | 0.6859  |
| <b>Model 2</b>                                                                                                                        | -0.01405 (0.01903)         | 0.4610  | 0.01456 (0.01502)          | 0.3333  | -0.00357 (0.01217)         | 0.7696  | -0.00310 (0.01866)         | 0.8684  |
| <b>Log transformed high-density lipoprotein cholesterol (mg/dL)</b>                                                                   |                            |         |                            |         |                            |         |                            |         |
| (Total number of observations=441; of which 47 (19.26%) subjects had one measurement, and 197 (80.74%) subjects had two measurements) |                            |         |                            |         |                            |         |                            |         |
| <b>Model 1</b>                                                                                                                        | 0.08260 (0.04335)          | 0.0579  | -0.01677 (0.03406)         | 0.6229  | -0.00074 (0.02769)         | 0.9788  | -0.09260 (0.04249)         | 0.0303  |
| <b>Model 2</b>                                                                                                                        | 0.04405 (0.04770)          | 0.3568  | 0.01789 (0.03828)          | 0.6407  | -0.02474 (0.03092)         | 0.4245  | -0.08213 (0.04670)         | 0.0799  |
| <b>Log transformed triglycerides (mg/dL)</b>                                                                                          |                            |         |                            |         |                            |         |                            |         |
| (Total number of observations=441; of which 47 (19.26%) subjects had one measurement, and 197 (80.74%) subjects had two measurements) |                            |         |                            |         |                            |         |                            |         |
| <b>Model 1</b>                                                                                                                        | -0.08894 (0.09237)         | 0.3365  | 0.1086 (0.07369)           | 0.1420  | -0.07136 (0.05967)         | 0.2329  | 0.1309 (0.09040)           | 0.1488  |
| <b>Model 2</b>                                                                                                                        | -0.04632 (0.08982)         | 0.6066  | 0.08574 (0.07154)          | 0.2319  | -0.06016 (0.05788)         | 0.2997  | 0.09421 (0.08801)          | 0.2854  |

- Model 1 includes *H19* z-scores for CpG site 1, 2, 3, and 4 as fixed effects, and compound symmetry matrix structure to model the covariance structure of the repeated measurements for each outcome
  - Model 2 is additionally adjusted for the following fixed effects: age and sex
- \*  $p < 0.008$

Supplementary Table S9: Associations between DNAm z-score at *H19* and Repeated Measures of Cardiometabolic Risk Factors using Mixed-effects Models Adjusting for Pubertal Onset ( $n=245$ ):

|                                                                                                                                       | <i>H19</i> score at site 1 |         | <i>H19</i> score at site 2 |         | <i>H19</i> score at site 3 |         | <i>H19</i> score at site 4 |         |
|---------------------------------------------------------------------------------------------------------------------------------------|----------------------------|---------|----------------------------|---------|----------------------------|---------|----------------------------|---------|
|                                                                                                                                       | Estimate (SE)              | P-value |
| <b>Waist circumference (cm)</b>                                                                                                       |                            |         |                            |         |                            |         |                            |         |
| (Total number of observations=446; of which 44 (17.96%) subjects had one measurement, and 201 (82.04%) subjects had two measurements) |                            |         |                            |         |                            |         |                            |         |
| <b>Model 1</b>                                                                                                                        | -2.0199 (2.3712)           | 0.3951  | 0.4201 (0.9290)            | 0.6515  | -0.1023 (1.0516)           | 0.9226  | 1.7246 (2.3175)            | 0.4575  |
| <b>Model 2</b>                                                                                                                        | -0.4601 (2.2842)           | 0.8405  | 0.1017 (0.9050)            | 0.9106  | 0.02333 (1.0184)           | 0.9817  | 1.0305 (2.2331)            | 0.6449  |
| <b>Systolic blood pressure (mmHg)</b>                                                                                                 |                            |         |                            |         |                            |         |                            |         |
| (Total number of observations=446; of which 44 (17.96%) subjects had one measurement, and 201 (82.04%) subjects had two measurements) |                            |         |                            |         |                            |         |                            |         |
| <b>Model 1</b>                                                                                                                        | 2.9254 (1.9347)            | 0.1318  | 0.5769 (0.7460)            | 0.4402  | -0.3888 (0.8519)           | 0.6485  | -2.0551 (1.8928)           | 0.2786  |
| <b>Model 2</b>                                                                                                                        | 2.2231 (1.9256)            | 0.2495  | 0.8875 (0.7469)            | 0.2360  | -0.1066 (0.8494)           | 0.9003  | -1.6144 (1.8851)           | 0.3926  |
| <b>Diastolic blood pressure (mmHg)</b>                                                                                                |                            |         |                            |         |                            |         |                            |         |
| (Total number of observations=446; of which 44 (17.96%) subjects had one measurement, and 201 (82.04%) subjects had two measurements) |                            |         |                            |         |                            |         |                            |         |
| <b>Model 1</b>                                                                                                                        | 1.9218 (1.3080)            | 0.1430  | 0.07059 (0.5004)           | 0.8880  | -0.1770 (0.5740)           | 0.7580  | -1.1655 (1.2803)           | 0.3635  |
| <b>Model 2</b>                                                                                                                        | 1.7623 (1.2916)            | 0.1737  | 0.2580 (0.4953)            | 0.6030  | -0.01024 (0.5665)          | 0.9856  | -1.1167 (1.2655)           | 0.3784  |
| <b>Log transformed fasting glucose(mg/dL)</b>                                                                                         |                            |         |                            |         |                            |         |                            |         |
| (Total number of observations=443; of which 47 (19.18%) subjects had one measurement, and 198 (80.82%) subjects had two measurements) |                            |         |                            |         |                            |         |                            |         |
| <b>Model 1</b>                                                                                                                        | -0.00046<br>(0.01808)      | 0.9796  | 0.002770 (0.006771)        | 0.6829  | 0.004283 (0.007883)        | 0.5875  | -0.00728 (0.01773)         | 0.6816  |
| <b>Model 2</b>                                                                                                                        | -0.01454<br>(0.01894)      | 0.4434  | 0.008114 (0.007262)        | 0.2652  | 0.003016 (0.008321)        | 0.7174  | -0.00410 (0.01855)         | 0.8254  |
| <b>Log transformed high-density lipoprotein cholesterol (mg/dL)</b>                                                                   |                            |         |                            |         |                            |         |                            |         |
| (Total number of observations=443; of which 47 (19.18%) subjects had one measurement, and 198 (80.82%) subjects had two measurements) |                            |         |                            |         |                            |         |                            |         |
| <b>Model 1</b>                                                                                                                        | 0.08297<br>(0.04325)       | 0.0562  | -0.00522 (0.01640)         | 0.7507  | -0.00854 (0.01895)         | 0.6527  | -0.09188 (0.04237)         | 0.0311  |
| <b>Model 2</b>                                                                                                                        | 0.04758<br>(0.04618)       | 0.3039  | 0.01380 (0.01815)          | 0.4478  | -0.01387 (0.02052)         | 0.4996  | -0.08614 (0.04517)         | 0.0577  |
| <b>Log transformed triglycerides (mg/dL)</b>                                                                                          |                            |         |                            |         |                            |         |                            |         |
| (Total number of observations=443; of which 47 (19.18%) subjects had one measurement, and 198 (80.82%) subjects had two measurements) |                            |         |                            |         |                            |         |                            |         |
| <b>Model 1</b>                                                                                                                        | -0.09145<br>(0.09240)      | 0.3233  | 0.03856 (0.03589)          | 0.2838  | -0.02407 (0.04087)         | 0.5566  | 0.1266 (0.09037)           | 0.1626  |
| <b>Model 2</b>                                                                                                                        | -0.04758<br>(0.08978)      | 0.5966  | 0.03750 (0.03488)          | 0.2834  | -0.02833 (0.03968)         | 0.4760  | 0.09109 (0.08788)          | 0.3010  |

- Model 1 includes *H19* z-scores for CpG site 1, 2, 3, and 4 as fixed effects, and compound symmetry matrix structure to model the covariance structure of the repeated measurements for each outcome

- Model 2 is additionally adjusted for the following fixed effects: age, sex, and pubertal onset

\*  $p < 0.008$

Supplementary Table S10: Cross-sectional Associations between DNAm z-score at *PPAR-α* and Cardiometabolic Risk Factors using Linear Regression Adjusting for Pubertal Onset ( $n=345$ ):

|                                                                              | <i>PPAR-α</i> score at site 1 |         | <i>PPAR-α</i> score at site 2 |         |
|------------------------------------------------------------------------------|-------------------------------|---------|-------------------------------|---------|
|                                                                              | Estimate (SE)                 | P-value | Estimate (SE)                 | P-value |
| <b>Waist circumference (cm) (N= 345)</b>                                     |                               |         |                               |         |
| <b>Model 1</b>                                                               | 0.71915 (0.71474)             | 0.3150  | -1.70941 (0.65445)            | 0.0094  |
| <b>Model 2</b>                                                               | 1.01378 (0.70496)             | 0.1513  | -1.69631 (0.64590)            | 0.0090  |
| <b>Systolic blood pressure (mmHg) (N= 345)</b>                               |                               |         |                               |         |
| <b>Model 1</b>                                                               | 0.58582 (0.60305)             | 0.3320  | -1.02922 (0.55218)            | 0.0632  |
| <b>Model 2</b>                                                               | 0.50301 (0.58038)             | 0.3867  | -0.67188 (0.53176)            | 0.2073  |
| <b>Diastolic blood pressure (mmHg) (N= 345)</b>                              |                               |         |                               |         |
| <b>Model 1</b>                                                               | 0.58530 (0.42242)             | 0.1668  | -0.57466 (0.38679)            | 0.1383  |
| <b>Model 2</b>                                                               | 0.59009 (0.40685)             | 0.1479  | -0.34991 (0.37276)            | 0.3486  |
| <b>Log transformed fasting glucose (mg/dL) (N=310)</b>                       |                               |         |                               |         |
| <b>Model 1</b>                                                               | 0.00598 (0.00614)             | 0.3305  | 0.00016627 (0.00600)          | 0.9779  |
| <b>Model 2</b>                                                               | 0.00293 (0.00609)             | 0.6309  | 0.00134 (0.00595)             | 0.8216  |
| <b>Log transformed high-density lipoprotein cholesterol (mg/dL) (N= 310)</b> |                               |         |                               |         |
| <b>Model 1</b>                                                               | -0.00813 (0.01303)            | 0.5329  | 0.01206 (0.01273)             | 0.3445  |
| <b>Model 2</b>                                                               | -0.00404 (0.01310)            | 0.7577  | 0.00824 (0.01281)             | 0.5205  |
| <b>Log transformed triglycerides (mg/dL) (N= 310)</b>                        |                               |         |                               |         |
| <b>Model 1</b>                                                               | 0.01232 (0.03058)             | 0.6873  | 0.00118 (0.02989)             | 0.9684  |
| <b>Model 2</b>                                                               | 0.02099 (0.03062)             | 0.4936  | -0.01145 (0.02995)            | 0.7026  |

- Peroxisome proliferator-activated receptor alpha (*PPAR-α*).
- Model 1 includes *PPAR-α* z-scores for CpG site 1 and 2
- Model 2 is additionally adjusted for age, sex, and pubertal onset

\*  $p < 0.008$

Supplementary Table S11: Primer Sequences and Details of CpG Sites Assessed <sup>1</sup>:

| Gene or Element Name | # of CpG Sites Assessed | Loci of CpG Sites <sup>a</sup>                                          | Primer Sequences               |                                  |                         | Locus of Amplified Region    |
|----------------------|-------------------------|-------------------------------------------------------------------------|--------------------------------|----------------------------------|-------------------------|------------------------------|
|                      |                         |                                                                         | Forward                        | Reverse <sup>b</sup>             | Sequencing              |                              |
| LINE-1               | 4                       | Various <sup>c</sup>                                                    | TTGAGTTAGGTGTGG<br>GATATAGTT   | CAAAAAATCAAAAAAT<br>TCCCTTTCC    | AGGTGTGGAT<br>ATAGT     | Various <sup>3</sup>         |
| <i>11β-HSD-2</i>     | 5                       | chr16: 67430541,<br>67430543,<br>67430562,<br>67430564, and<br>67430580 | TTAAGTTTTGGAAGG<br>AAAGGGAAAGA | ACATCCCCATACCCTTT<br>ACTAATC     | AGTTTTTGTTT<br>TAGGTAGG | chr16: 67430512-<br>67430745 |
| <i>H19</i>           | 4                       | chr11: 2003031,<br>2003029, 2003027,<br>and 2003024                     | TTTGTTGATTTTATTA<br>AGGGAG     | CTATAAATAAACCCCA<br>ACCAAAC      | GTGTGGAATT<br>AGAAGT    | chr11: 2002966-<br>2003111   |
| <i>PPAR-α</i>        | 2                       | chr22: 46149160 and<br>46149179                                         | GGAGGTTTTTATGAG<br>GATGTAGTT   | ACACATATTAACCAAC<br>AATAACTATCAT | GGATGTGGTT<br>GTTTG     | chr22: 46149046-<br>46149244 |

**Notes:**

a. Loci are based off genome build GRCh38/hg38

b. All reverse primers for pyrosequencing are 5'biotinylated.

c. A consensus sequence found in all LINE-1s (located throughout the genome) is amplified and sequenced here. The specific sequence is as follows: 5'-

CTCGTG GTGCGCCGTTTCTTAAGCCG

Long interspersed nuclear elements (LINE-1); 11β-hydroxysteroid dehydrogenase type 2 (*11β-HSD-2*); Peroxisome proliferator-activated receptor alpha (*PPAR-α*).



Supplementary Table S12: Average DNAm z-score at LINE-1<sup>1</sup> and Confounders Selection:

|                                                              | Average DNAm z-score at LINE-1 |                     |                      |                      | P-value |
|--------------------------------------------------------------|--------------------------------|---------------------|----------------------|----------------------|---------|
|                                                              | Q 1<br><i>n</i> = 59           | Q 2<br><i>n</i> =61 | Q 3<br><i>n</i> = 61 | Q 4<br><i>n</i> = 61 |         |
| Maternal Characteristics (at time of child’s birth)          |                                |                     |                      |                      |         |
| Years of education, %                                        |                                |                     |                      |                      | 0.1872  |
| < 12 years                                                   | 55.93                          | 47.54               | 37.70                | 55.74                |         |
| 12 years                                                     | 25.42                          | 40.98               | 45.90                | 34.43                |         |
| > 12 years                                                   | 18.64                          | 11.48               | 16.39                | 9.84                 |         |
| Age at childbirth, (years)                                   | 26.83                          | 27.07               | 25.93                | 27.39                | 0.5188  |
| Parity, %                                                    |                                |                     |                      |                      | 0.1721  |
| 1                                                            | 33.90                          | 31.15               | 47.54                | 36.07                |         |
| 2                                                            | 33.90                          | 44.26               | 36.07                | 29.51                |         |
| ≥ 3                                                          | 32.20                          | 24.59               | 16.39                | 34.43                |         |
| Marital Status, %                                            |                                |                     |                      |                      | 0.1149  |
| Married                                                      | 59.32                          | 72.13               | 73.77                | 78.69                |         |
| Others (includes free union, single, separated, or divorced) | 40.68                          | 27.87               | 26.23                | 21.31                |         |
| Enrollment in calcium supplementation study, %               |                                |                     |                      |                      | 0.4494  |
| Not enrolled                                                 | 59.32                          | 57.38               | 70.49                | 60.66                |         |
| Enrolled during pregnancy                                    | 40.68                          | 42.62               | 29.51                | 39.34                |         |
| Child Characteristics (at birth)                             |                                |                     |                      |                      |         |
| Female, %                                                    | 70.00                          | 52.46               | 52.46                | 39.34                | 0.0092* |
| Gestation age, (weeks)                                       | 38.81                          | 38.82               | 38.97                | 38.75                | 0.9037  |
| Mode of delivery, %                                          |                                |                     |                      |                      | 0.3939  |
| Vaginal delivery                                             | 50.85                          | 55.74               | 55.74                | 66.10                |         |
| C Section                                                    | 49.15                          | 44.26               | 44.26                | 33.90                |         |
| Birth weight, (kg)                                           | 3.15                           | 3.13                | 3.20                 | 3.13                 | 0.8137  |
| Breastfeeding duration, (weeks)                              | 6.41                           | 8.23                | 9.57                 | 8.44                 | 0.0171* |
| Child Characteristics (at follow-up visits)                  |                                |                     |                      |                      |         |
| Age, (years)                                                 | 9.65                           | 10.32               | 10.73                | 10.63                | 0.0003* |
| Metabolic equivalents, (METs/week)                           | 31.24                          | 29.92               | 32.39                | 31.58                | 0.9341  |
| Pubertal onset, %                                            | 25.00                          | 44.26               | 57.38                | 42.62                | 0.0044* |
| Total caloric intake, (kcal/day)                             | 2617.89                        | 2778.31             | 2576.08              | 2578.95              | 0.3748  |

<sup>1</sup> Average DNAm at LINE-1 was computed as the average LINE-1 z-score at CpG site 1, 2, 3, and 4.

Means or percentages are presented for continuous or categorical variables, respectively.

Long interspersed nuclear elements (LINE-1)

\*  $p < 0.05$

Supplementary Table S13: Average DNAm z-score at *11β-HSD-2*<sup>1</sup> and Confounders Selection:

|                                                              | Average DNAm z-score at <i>11β-HSD-2</i> |                      |                      |                      | P-value |
|--------------------------------------------------------------|------------------------------------------|----------------------|----------------------|----------------------|---------|
|                                                              | Q 1<br><i>n</i> = 61                     | Q 2<br><i>n</i> = 62 | Q 3<br><i>n</i> = 62 | Q 4<br><i>n</i> = 61 |         |
| Maternal Characteristics (at time of child’s birth)          |                                          |                      |                      |                      |         |
| Years of education, %                                        |                                          |                      |                      |                      | 0.3280  |
| < 12 years                                                   | 55.74                                    | 48.39                | 46.77                | 45.90                |         |
| 12 years                                                     | 32.79                                    | 45.16                | 33.87                | 34.43                |         |
| > 12 years                                                   | 11.48                                    | 6.45                 | 17.74                | 19.67                |         |
| Age at childbirth, (years)                                   | 26.62                                    | 26.97                | 27.16                | 26.67                | 0.9460  |
| Parity, %                                                    |                                          |                      |                      |                      | 0.6075  |
| 1                                                            | 34.43                                    | 38.71                | 29.03                | 44.26                |         |
| 2                                                            | 40.98                                    | 32.26                | 41.94                | 29.51                |         |
| ≥ 3                                                          | 24.59                                    | 29.03                | 27.42                | 26.23                |         |
| Marital Status, %                                            |                                          |                      |                      |                      | 0.5323  |
| Married                                                      | 72.13                                    | 64.52                | 72.58                | 75.41                |         |
| Others (includes free union, single, separated, or divorced) | 27.87                                    | 35.48                | 25.81                | 24.59                |         |
| Enrollment in calcium supplementation study, %               |                                          |                      |                      |                      | 0.6592  |
| Not enrolled                                                 | 57.38                                    | 66.13                | 62.90                | 60.66                |         |
| Enrolled during pregnancy                                    | 42.62                                    | 33.87                | 35.48                | 39.34                |         |
| Child Characteristics (at birth)                             |                                          |                      |                      |                      |         |
| Female, %                                                    | 50.82                                    | 56.45                | 51.61                | 54.10                | 0.9223  |
| Gestation age, (weeks)                                       | 38.83                                    | 39.13                | 38.52                | 38.90                | 0.1080  |
| Mode of delivery, %                                          |                                          |                      |                      |                      | 0.8987  |
| Vaginal delivery                                             | 52.46                                    | 61.29                | 59.68                | 54.10                |         |
| C Section                                                    | 45.90                                    | 38.71                | 38.71                | 44.26                |         |
| Birth weight, (kg)                                           | 3.16                                     | 3.15                 | 3.11                 | 3.18                 | 0.8933  |
| Breastfeeding duration, (weeks)                              | 8.13                                     | 7.40                 | 8.46                 | 8.61                 | 0.7751  |
| Child Characteristics (at follow-up visits)                  |                                          |                      |                      |                      |         |
| Age, (years)                                                 | 9.90                                     | 10.64                | 10.50                | 10.30                | 0.0466* |
| Metabolic equivalents, (METs/week)                           | 29.31                                    | 29.89                | 34.25                | 32.04                | 0.5216  |
| Pubertal onset, %                                            | 36.07                                    | 48.39                | 45.16                | 37.70                | 0.4510  |
| Total caloric intake, (kcal/day)                             | 2811.31                                  | 2640.92              | 2514.23              | 2580.73              | 0.1279  |

<sup>1</sup> Average DNAm at *11β-HSD-2* was computed as the average *11β-HSD-2* z-score at CpG site 1, 2, 3, 4 and 5.

Means or percentages are presented for continuous or categorical variables, respectively.

*11β*-hydroxysteroid dehydrogenase type 2 (*11β-HSD-2*)

\*  $p < 0.05$

Supplementary Table S14: Average DNAm z-score at *H19*<sup>1</sup> and Confounders Selection:

|                                                              | Average DNAm z-score at <i>H19</i> |                      |                      |                      | P-value |
|--------------------------------------------------------------|------------------------------------|----------------------|----------------------|----------------------|---------|
|                                                              | Q 1<br><i>n</i> = 61               | Q 2<br><i>n</i> = 61 | Q 3<br><i>n</i> = 62 | Q 4<br><i>n</i> = 61 |         |
| Maternal Characteristics (at time of child's birth)          |                                    |                      |                      |                      |         |
| Years of education, %                                        |                                    |                      |                      |                      | 0.8105  |
| < 12 years                                                   | 47.54                              | 44.26                | 51.61                | 52.46                |         |
| 12 years                                                     | 37.70                              | 42.62                | 35.48                | 31.15                |         |
| > 12 years                                                   | 14.75                              | 13.11                | 11.29                | 16.39                |         |
| Age at childbirth, (years)                                   | 26.48                              | 26.69                | 26.98                | 27.07                | 0.9340  |
| Parity, %                                                    |                                    |                      |                      |                      | 0.0663  |
| 1                                                            | 49.18                              | 31.15                | 32.26                | 34.43                |         |
| 2                                                            | 27.87                              | 42.62                | 27.42                | 45.90                |         |
| ≥ 3                                                          | 22.95                              | 26.23                | 38.71                | 19.67                |         |
| Marital Status, %                                            |                                    |                      |                      |                      | 0.1071  |
| Married                                                      | 75.41                              | 80.33                | 69.35                | 59.02                |         |
| Others (includes free union, single, separated, or divorced) | 24.59                              | 19.67                | 29.03                | 40.98                |         |
| Enrollment in calcium supplementation study, %               |                                    |                      |                      |                      | 0.7226  |
| Not enrolled                                                 | 63.93                              | 65.57                | 58.06                | 60.66                |         |
| Enrolled during pregnancy                                    | 36.07                              | 34.43                | 40.32                | 39.34                |         |
| Child Characteristics (at birth)                             |                                    |                      |                      |                      |         |
| Female, %                                                    | 49.18                              | 52.46                | 50.00                | 60.66                | 0.5675  |
| Gestation age, (weeks)                                       | 38.82                              | 38.71                | 38.89                | 38.95                | 0.6168  |
| Mode of delivery, %                                          |                                    |                      |                      |                      | 0.6757  |
| Vaginal delivery                                             | 62.30                              | 59.02                | 58.06                | 47.54                |         |
| C Section                                                    | 36.07                              | 40.98                | 40.32                | 50.82                |         |
| Birth weight, (kg)                                           | 3.20                               | 3.13                 | 3.10                 | 3.18                 | 0.5830  |
| Breastfeeding duration, (weeks)                              | 9.43                               | 8.38                 | 6.89                 | 8.03                 | 0.0799  |
| Child Characteristics (at follow-up visits)                  |                                    |                      |                      |                      |         |
| Age, (years)                                                 | 10.59                              | 10.65                | 10.28                | 9.86                 | 0.0140* |
| Metabolic equivalents, (METs/week)                           | 34.89                              | 28.64                | 32.34                | 29.74                | 0.2589  |
| Pubertal onset, %                                            | 47.54                              | 40.98                | 48.39                | 31.15                | 0.1886  |
| Total caloric intake, (kcal/day)                             | 2581.31                            | 2483.39              | 2709.46              | 2770.89              | 0.2434  |

<sup>1</sup> Average DNAm at *H19* was computed as the average *H19* z-score at CpG site 1, 2, 3, and 4.

Means or percentages are presented for continuous or categorical variables, respectively

\*  $p < 0.05$

Supplementary Table S15: Average DNAm z-score at *PPAR-α*<sup>1</sup> and Confounders Selection:

|                                                              | Average DNAm z-score at <i>PPAR-α</i> |                      |                      |                      |         |
|--------------------------------------------------------------|---------------------------------------|----------------------|----------------------|----------------------|---------|
|                                                              | Q 1<br><i>n</i> = 89                  | Q 2<br><i>n</i> = 89 | Q 3<br><i>n</i> = 91 | Q 4<br><i>n</i> = 89 | P-value |
| Maternal Characteristics (at time of child’s birth)          |                                       |                      |                      |                      |         |
| Years of education, %                                        |                                       |                      |                      |                      |         |
| < 12 years                                                   | 43.82                                 | 58.43                | 49.45                | 53.93                | 0.0766  |
| 12 years                                                     | 40.45                                 | 29.21                | 42.86                | 26.97                |         |
| > 12 years                                                   | 15.73                                 | 12.36                | 6.59                 | 19.10                |         |
| Age at childbirth, (years)                                   | 26.38                                 | 27.04                | 26.36                | 25.93                | 0.5899  |
| Parity, %                                                    |                                       |                      |                      |                      |         |
| 1                                                            | 44.94                                 | 37.08                | 40.66                | 32.58                | 0.1289  |
| 2                                                            | 34.83                                 | 28.09                | 35.16                | 46.07                |         |
| ≥ 3                                                          | 20.22                                 | 34.83                | 23.08                | 21.35                |         |
| Marital Status, %                                            |                                       |                      |                      |                      |         |
| Married                                                      | 76.40                                 | 78.65                | 70.33                | 65.17                | 0.2510  |
| Others (includes free union, single, separated, or divorced) | 23.60                                 | 21.35                | 28.57                | 34.83                |         |
| Enrollment in calcium supplementation study, %               |                                       |                      |                      |                      |         |
| Not enrolled                                                 | 76.40                                 | 67.42                | 65.93                | 64.04                | 0.3655  |
| Enrolled during pregnancy                                    | 23.60                                 | 32.58                | 32.97                | 35.96                |         |
| Child Characteristics (at birth)                             |                                       |                      |                      |                      |         |
| Female, %                                                    | 51.69                                 | 44.94                | 52.75                | 57.30                | 0.4259  |
| Gestation age, (weeks)                                       | 38.78                                 | 38.70                | 39.03                | 38.62                | 0.3877  |
| Mode of delivery, %                                          |                                       |                      |                      |                      |         |
| Vaginal delivery                                             | 58.43                                 | 49.44                | 61.54                | 65.17                | 0.3060  |
| C Section                                                    | 40.45                                 | 50.56                | 37.36                | 34.83                |         |
| Birth weight, (kg)                                           | 3.09                                  | 3.16                 | 3.18                 | 3.18                 | 0.6758  |
| Breastfeeding duration, (weeks)                              | 8.20                                  | 9.12                 | 7.41                 | 7.75                 | 0.1482  |
| Child Characteristics (at follow-up visits)                  |                                       |                      |                      |                      |         |
| Age, (years)                                                 | 14.49                                 | 14.39                | 13.84                | 13.73                | 0.0318* |
| Metabolic equivalents, (METs/week)                           | 60.98                                 | 65.32                | 54.85                | 61.38                | 0.1592  |
| Pubertal onset, %                                            | 92.13                                 | 94.38                | 92.31                | 92.13                | 0.9824  |
| Total caloric intake, (kcal/day)                             | 2423.71                               | 2562.43              | 2144.12              | 2315.97              | 0.1417  |

<sup>1</sup> Average DNAm at *PPAR-α* was computed as the average *PPAR-α* z-score at CpG site 1, and 2.

Means or percentages are presented for continuous or categorical variables, respectively.

Peroxisome proliferator-activated receptor alpha (*PPAR-α*)

\*  $p < 0.05$

## References

1. Wu, Y.; Goodrich, J.M.; Dolinoy, D.C.; Sanchez, B.N.; Ruiz-Narvaez, E.A.; Banker, M.; Cantoral, A.; Mercado-Garcia, A.; Tellez-Rojo, M.M.; Peterson, K.E. Accelerometer-measured Physical Activity, Reproductive Hormones, and DNA Methylation. *Med. Sci. Sports Exerc.* **2020**, *52*, 598-607, doi:10.1249/MSS.0000000000002175.
